# Supplementary material for: Cytogenetic damage analysis in mice chronically exposed to low-dose internal tritium beta-particle radiation
Source: PubMed Central journal article supplement (PMC6007944; doi:10.18632/oncotarget.25282), 2018-06-08
Supplement: oncotarget-09-27397-s001.pdf [file oncotarget-09-27397-s001.pdf]

## Cytogenetic damage analysis in mice chronically exposed to low-dose internal tritium beta-particle radiation

### SUPPLEMENTARY MATERIALS

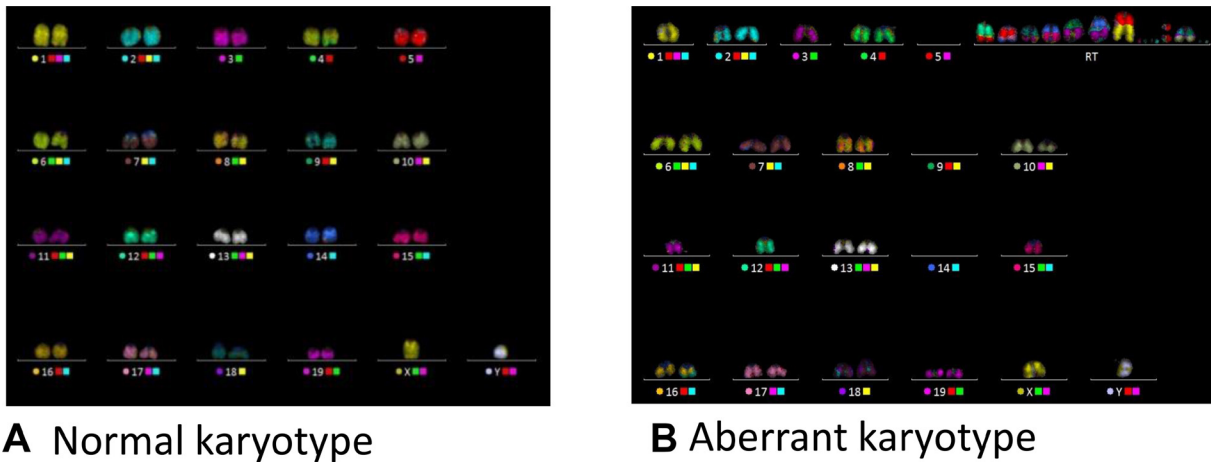

**Figure 1:** Mouse lymphocytes were processed using M-FISH as described in Materials and Methods and metaphase chromosomes were photographed and assembled together. (A) representative image of a normal karyotype. (B), example of an aberrant karyotype.
